# Supplementary material
Source: publisher figshare collection journal article supplement (https://sage.figshare.com/ndownloader/files/22784237)
Supplement: Supplementary file 1 [file 22784237]

## Appendix 1

Table 3: Details of work stream 1



| Activity                                         | Work stream 1 objectives                    | Data collection method                                                                                                                                                                                                                                                                                                                                                                                                                                                        |
|--------------------------------------------------|---------------------------------------------|-------------------------------------------------------------------------------------------------------------------------------------------------------------------------------------------------------------------------------------------------------------------------------------------------------------------------------------------------------------------------------------------------------------------------------------------------------------------------------|
| 30-45 minute real-world remote visit simulations | Feasibility                                 | Researcher observations of visit process recorded in handwritten note form                                                                                                                                                                                                                                                                                                                                                                                                    |
|                                                  | Feasibility                                 | Start and finish time of visit recorded by researcher                                                                                                                                                                                                                                                                                                                                                                                                                         |
|                                                  | Concurrent acceptability                    | Concurrent participant feedback collected using researcher handwritten notes                                                                                                                                                                                                                                                                                                                                                                                                  |
| 50 minute discussion                             | Retrospective acceptability                 | Researcher facilitated participant discussion exploring retrospective acceptability of the remote visit including what features of the system could be improved recorded in written note form by the researcher                                                                                                                                                                                                                                                               |
| 10 minute questionnaire                          | Retrospective acceptability and feasibility | Anonymous participant questionnaire containing: <ul style="list-style-type: none"> <li>Open ended questions aiming to capture the participant's qualitative assessment of the system retrospective acceptability</li> <li>Likert scale usability questions derived from System Usability Score (SUS) (Brooke, 1996) which explored the participants' assessment of the system's feasibility; usability, learnability and user experience (Mazumdar et al., 2017b).</li> </ul> |

Table 4: Details of work stream 2



| Activity           | Work Stream 2 objectives          | Data collection method                                                                                                                                                                                                                                                                                                                                                                                                                                                                                                                                           |
|--------------------|-----------------------------------|------------------------------------------------------------------------------------------------------------------------------------------------------------------------------------------------------------------------------------------------------------------------------------------------------------------------------------------------------------------------------------------------------------------------------------------------------------------------------------------------------------------------------------------------------------------|
| User consultations | Online anonymous staff survey     | All Occupational Therapy staff (n=87) within the participating NHS Trust sent an online survey via Survey Monkey (SurveyMonkey.com, 2019) containing participant information sheet and technology description <ul style="list-style-type: none"> <li>26 responses from 10 clinical areas</li> <li>10 questions requiring Likert scale (Likert, 1932), open text or multiple choice answers collecting data on staff roles, clinical area, frequency of home visit completion and subjective opinion of the technology utility, benefits and drawbacks</li> </ul> |
|                    | Staff presentation and discussion | 30 minute project presentation and discussion session to a clinical forum of self-selecting Occupational Therapy staff from the participating NHS Trust (n= 30) facilitated by the Clinical academic Occupational Therapist collecting feedback via anonymous hand written notes. Discussion focused on five specific questions regarding the benefits and drawbacks of the technology                                                                                                                                                                           |
|                    | PPI presentation and discussion   | 30 minute project presentation and discussion to self selecting members of the participating NHS Trust's Therapeutics and Palliative Care Patient and Public Engagement Panel (n=3) undertaken by the clinical Occupational Therapist who collected feedback via anonymous hand written notes. Discussion focused on five specific questions regarding the benefits and drawbacks of the technology                                                                                                                                                              |

Table 5: Details of work stream 3



| Activity                                      | Work stream 3 objectives                                                                                 | Data collection method                                                                                                                        |
|-----------------------------------------------|----------------------------------------------------------------------------------------------------------|-----------------------------------------------------------------------------------------------------------------------------------------------|
| Self-reported narrative case study collection | Exploration of prospective acceptability of remote visits, with specific reference to potential benefits | Collection of five self-reported narrative case studies from three clinical Occupational Therapy services within the participating NHS Trust. |

**Comment [JR1]:** Table has been amended

**Comment [JR2]:** Delete this table

**Comment [JR3]:** Use this table instead

Table 6: Details of work stream 4



| Activity                                                         | Work stream 4 objectives                                                                                     | Data collection method                                                                                                                                                                                                                          |
|------------------------------------------------------------------|--------------------------------------------------------------------------------------------------------------|-------------------------------------------------------------------------------------------------------------------------------------------------------------------------------------------------------------------------------------------------|
| Exploration of traditional and remote visit resource utilisation | Exploration of prospective acceptability, with specific reference to potential resource utilisation benefits | Three key NHS Occupational Therapy services within the participating NHS asked to self-report information regarding the duration, frequency, destination and staffing levels for all traditional access visits completed over the previous year |
